# Supplementary material for: Expression of progerin in aging mouse brains reveals structural nuclear abnormalities without detectible significant alterations in gene expression, hippocampal stem cells or behavior
Source: PubMed Central journal article supplement — Hum Mol Genet. 2014 Oct 24;24(5):1305–21. doi: 10.1093/hmg/ddu541 (PMC4321440; doi:10.1093/hmg/ddu541), 2014-10-24
Supplement: supp_ddu541_ddu541supp.pdf [file supp_ddu541_ddu541supp.pdf]

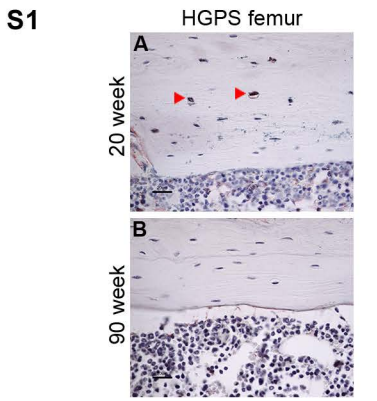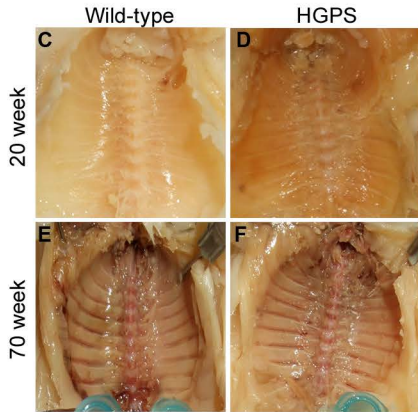

**Figure S1. Very low transgenic expression and no defects in the bone.** Immunohistochemical labelling for transgenic lamin A/progerin in the HGPS femur (A, B) showed that there were very few osteocytes that are positive for the transgene (arrowheads) at 20 weeks, and almost none in the 90 week old HGPS animals. Neither HGPS nor wild-type animals had any calluses at either 20 or 70 weeks of age (C-F). Scale bars: 20µm.

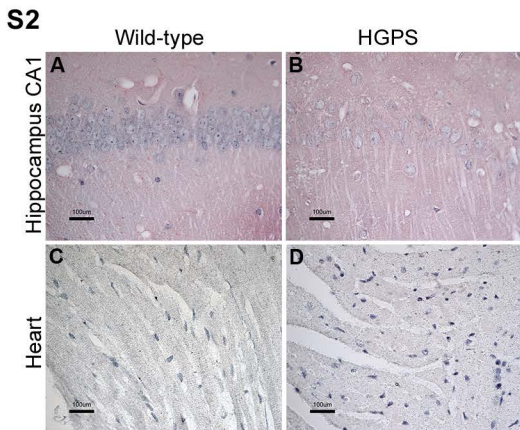

**Figure S2. Immunohistochemical labelling of cleaved caspase-3 in the brain and heart tissue.** To examine for the presence of apoptosis in the HGPS animals, 90-week old brain and 74-week old heart tissues were labelled with cleaved caspase-3 antibody. There were no positive labelling in both wild-type or HGPS animals. Scale bars: 100µm.

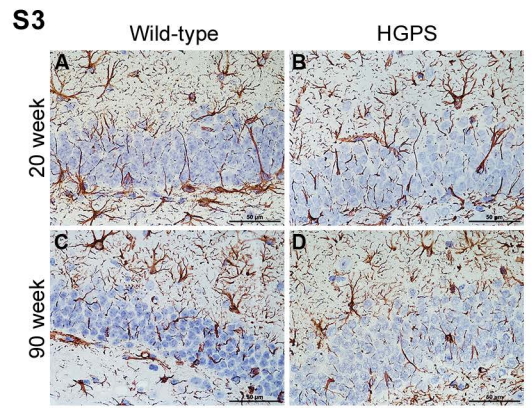

**Figure S3. No astrocyte activation in the brain.** Immunohistochemical labelling for glial fibrillary acidic protein showed no astrocyte activation in either HGPS or wild-type animals. Images are from the hilus region of the dentate gyrus. Scale bars: 50µm.

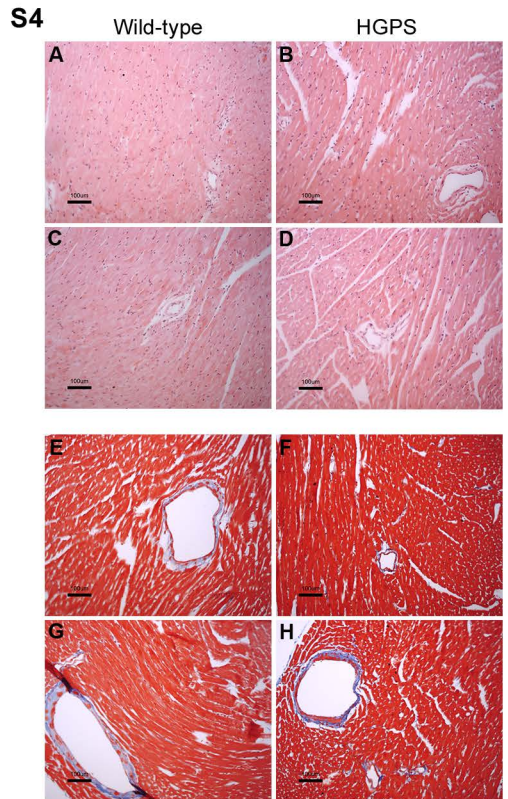

**Figure S4. No defects in the heart.** Haematoxylin and eosin (A-D) and Masson's trichrome (E-H) stainings showed that both HGPS and wild-type animals had no defects in the heart at 74 weeks of age. Images are from the ventricle (A, B, E, F) and the atrium (C, D, G, H). Scale bars: 100µm.

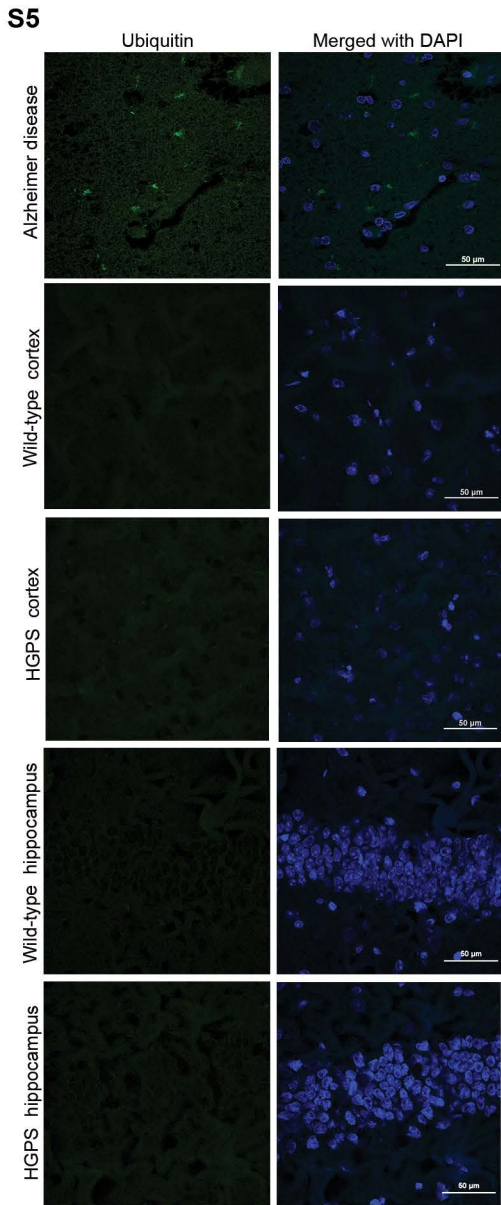

**Figure S5. No evidence of protein inclusions in brain from HGPS animals.** Immunofluorescent labelling for ubiquitin in sections from 90 week old brain tissue from wild-type and HGPS animals. Immunoreactivity for ubiquitin was seen in the positive control sample with brain tissue obtained postmortem from a patient with Alzheimer disease. Representative images from hippocampus are from the CA1 region. Scale bars: 50µm.

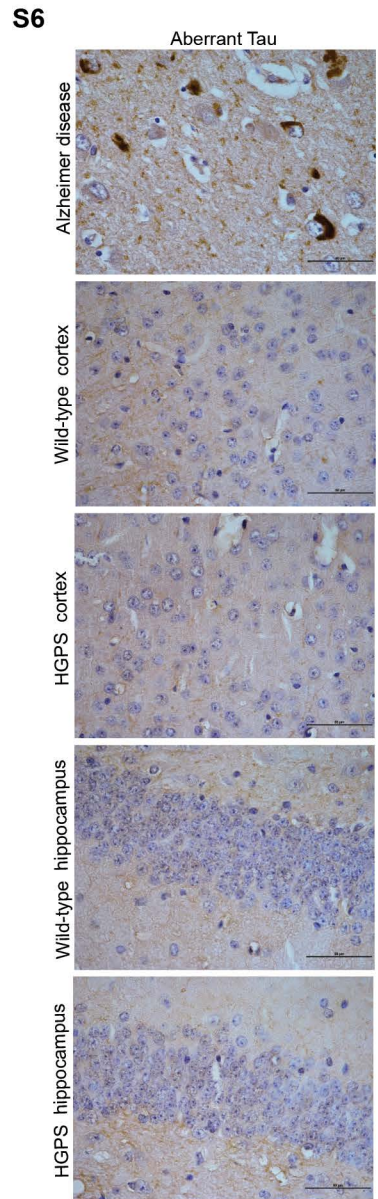

**Figure S6. No evidence for presence of aberrant Tau in the brain from HGPS animals.** Immunohistochemical labelling for aberrant Tau (using the MC-1 antibody) in sections from cortex and hippocampus of 90 week old wild-type and HGPS animals did not show signs of protein aggregates, suggestive of neurodegeneration. Positive control sample from postmortem brain tissue from a patient with Alzheimer disease showed staining of neurofibrillary tangles, neurophil threads and dystrophic neuritis. Representative images from hippocampus are from the CA1 region. Scale bars: 50µm.



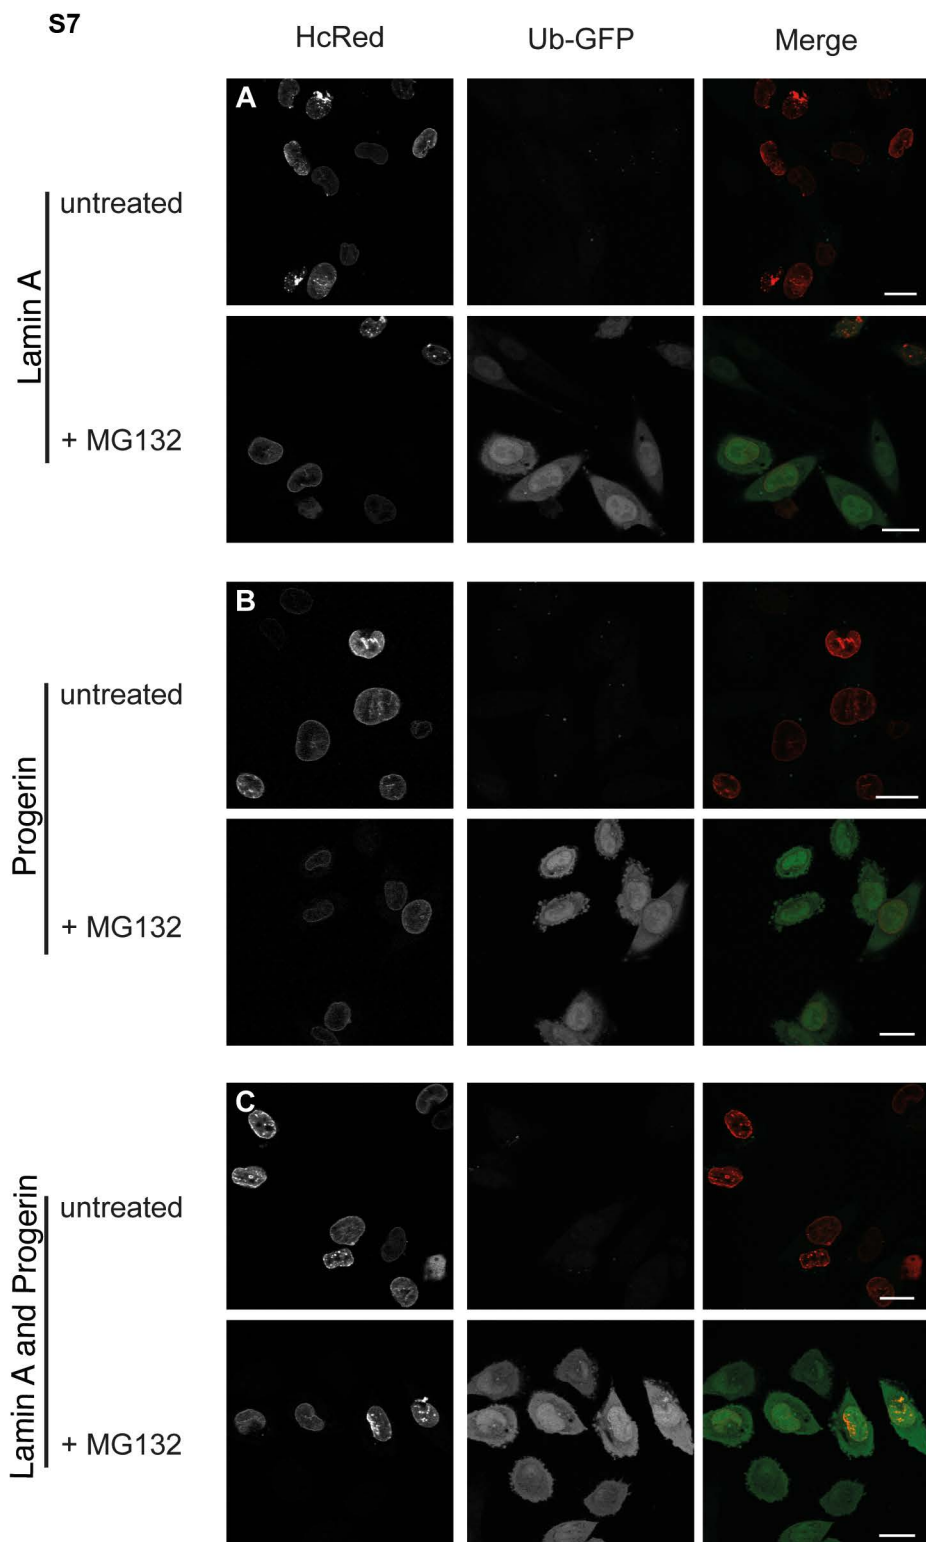

**Figure S7. Expression of progerin does not cause functional impairment of the ubiquitin/proteasome system.** Wild-type lamin A and two vectors that express either progerin or progerin and lamin A were transiently expressed in a human cell line (Me1JuSo) stably expressing a GFP-based substrate of the ubiquitin/proteasome system (Ub-GFP). Reporter Me1JuSo Ub-GFP stable cell line were transfected with HcRed-tagged Lamin A (A) and HcRed-Progerin (B) or HcRed-Lamin A and HcRed-Progerin (C). The cells were left untreated (upper panels) or treated for 5 hours with 10  $\mu$ M proteasome inhibitor MG132 to allow accumulation of the GFP reporter substrate. Scale bars: 20 $\mu$ m.

## Supplementary Table 1

**Table 1. Only 5 genes changed by 2-folds in HGPS mice.** Exon array analysis of the hippocampus from the HGPS animals showed that there were only 5 genes that increased or decreased by 2-folds compared to the wild-type animals (highlighted in pink). There were 46 genes that showed 1.5-fold change compared to the wild-type.

| Gene name                                                                                             | Gene symbol                                 | Fold change | P value | q-value |
|-------------------------------------------------------------------------------------------------------|---------------------------------------------|-------------|---------|---------|
| inter-alpha trypsin inhibitor, heavy chain 2                                                          | Itih2                                       | 2.14        | 0.035   | 0.400   |
| proteoglycan 4                                                                                        | Prg4                                        | 2.08        | 0.030   | 0.396   |
| histone cluster 1, H2bk                                                                               | Hist1h2bk                                   | 2.06        | 0.043   | 0.400   |
| kallikrein 1-related peptidase b9                                                                     | Klk1b9                                      | -2.16       | 0.018   | 0.390   |
| olfactory receptor 102                                                                                | Olf102                                      | -2.23       | 0.015   | 0.390   |
| fatty acid binding protein 5, epidermal                                                               | Fabp5                                       | 1.83        | 0.005   | 0.380   |
| solute carrier family 6 (neurotransmitter transporter, betaine/GABA), member 12                       | Slc6a12                                     | 1.83        | 0.029   | 0.394   |
| CD74 antigen (invariant polypeptide of major histocompatibility complex, class II antigen-associated) | Cd74                                        | 1.80        | 0.036   | 0.400   |
| myelin protein zero-like 2                                                                            | Mpzl2                                       | 1.75        | 0.032   | 0.398   |
| cyclin-dependent kinase inhibitor 1A (P21)                                                            | Cdkn1a                                      | 1.64        | 0.006   | 0.380   |
| RIKEN cDNA 1700010M22 gene                                                                            | 1700010M22Rik                               | 1.63        | 0.036   | 0.400   |
| lysozyme 2                                                                                            | Lyz2                                        | 1.62        | 0.038   | 0.400   |
| solute carrier family 22 (organic cation transporter), member 2                                       | Slc22a2                                     | 1.62        | 0.045   | 0.400   |
| insulin-like growth factor binding protein 7                                                          | Igfbp7                                      | 1.61        | 0.050   | 0.400   |
| musculoskeletal, embryonic nuclear protein 1                                                          | Mustn1                                      | 1.59        | 0.011   | 0.390   |
| vimentin                                                                                              | Vim                                         | 1.58        | 0.025   | 0.392   |
| lactate dehydrogenase B                                                                               | Ldhb                                        | 1.57        | 0.009   | 0.390   |
| fibronectin 1                                                                                         | <td>1.57</td> <td>0.019</td> <td>0.390</td> | 1.57        | 0.019   | 0.390   |
| ribosomal protein S20                                                                                 | Rps20                                       | 1.55        | 0.015   | 0.390   |
| histocompatibility 2, class II antigen A, alpha                                                       | H2-Aa                                       | 1.55        | 0.050   | 0.400   |
| neuronal PAS domain protein 4                                                                         | Npas4                                       | 1.54        | 0.025   | 0.394   |
| solute carrier family 22 (organic anion transporter), member 8                                        | Slc22a8                                     | 1.54        | 0.045   | 0.400   |
| polymerase I and transcript release factor                                                            | Ptrf                                        | 1.52        | 0.041   | 0.400   |
| lipocalin 2                                                                                           | Lon2                                        | 1.52        | 0.032   | 0.398   |
| polymerase (RNA) II (DNA directed) polypeptide H                                                      | Polr2h                                      | 1.51        | 0.033   | 0.398   |
| cellular retinoic acid binding protein II                                                             | Crabp2                                      | 1.51        | 0.025   | 0.393   |
| armadillo repeat containing, X-linked 5                                                               | Armxc5                                      | -1.50       | 0.002   | 0.380   |
| cDNA sequence BC003266                                                                                | BC003266                                    | -1.52       | 0.039   | 0.400   |
| late cornified envelope 3B                                                                            | Lce3b                                       | -1.54       | 0.038   | 0.400   |
| olfactory receptor 1196                                                                               | Olf1196                                     | -1.60       | 0.036   | 0.400   |
| transducin (beta)-like 1X-linked receptor 1                                                           | Tbl1xr1                                     | -1.61       | 0.0001  | 0.136   |
| arylacetamide deacetylase-like 1                                                                      | Nceh1                                       | -1.63       | 0.002   | 0.380   |
| Hermansky-Pudlak syndrome 3 homolog (human)                                                           | Hps3                                        | -1.63       | 0.00003 | 0.116   |
| olfactory receptor 610                                                                                | Olf610                                      | -1.64       | 0.026   | 0.394   |
| olfactory receptor 1270                                                                               | Olf1270                                     | -1.64       | 0.028   | 0.394   |
| high-mobility group nucleosome binding domain 5                                                       | Hmgn5                                       | -1.65       | 0.002   | 0.380   |
| olfactory receptor 1491                                                                               | Olf1491                                     | -1.66       | 0.029   | 0.394   |
| phosphodiesterase 7A                                                                                  | Pde7a                                       | -1.67       | 0.0002  | 0.254   |
| glycogenin                                                                                            | Gyg                                         | -1.71       | 0.0002  | 0.269   |
| MAS-related GPR, member A4                                                                            | Mrgpra4                                     | -1.74       | 0.030   | 0.396   |
| vomer nasal 1 receptor 232                                                                            | Vmn1r232                                    | -1.77       | 0.049   | 0.400   |
| vomer nasal 1 receptor 225                                                                            | Vmn1r225                                    | -1.79       | 0.002   | 0.380   |
| interferon alpha 12                                                                                   | Ifna12                                      | -1.85       | 0.002   | 0.380   |
| RRS1 ribosome biogenesis regulator homolog pseudogene                                                 | 4632415L05Rik                               | -1.90       | 0.001   | 0.380   |
| neuroigin 1                                                                                           | Nlgn1                                       | -1.92       | 0.0001  | 0.136   |
| helicase-like transcription factor                                                                    | Hltf                                        | -1.95       | 0.0003  | 0.286   |
